# Supplementary material for: Smad4 represses the generation of memory-precursor effector T cells but is required for the differentiation of central memory T cells
Source: PubMed Central journal article supplement (PMC4670941; doi:10.1038/cddis.2015.337), 2015-11-19
Supplement: cddis2015337x1.pdf [file cddis2015337x1.pdf]

## Supplementary Figures

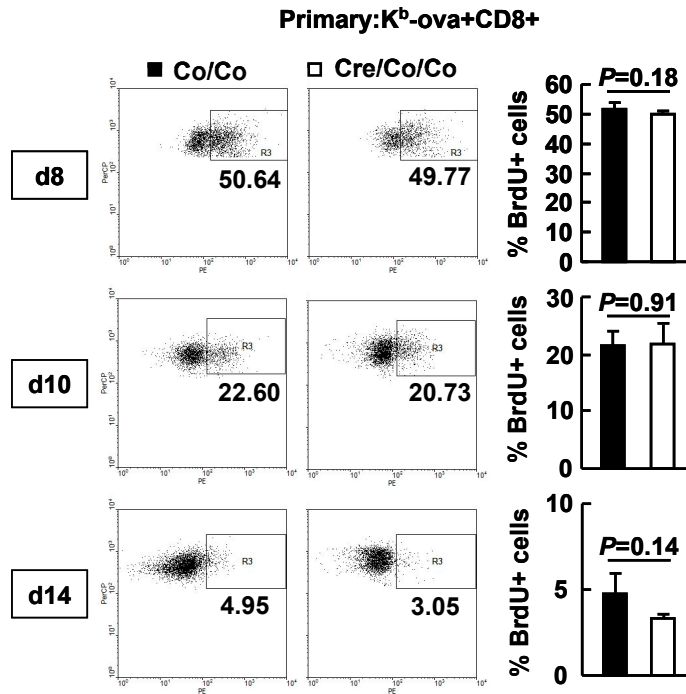

**Figure S1** Analysis of the proliferation of antigen-specific CD8<sup>+</sup> splenic T cells with BrdU incorporation 8, 10, 14 days postinfection.

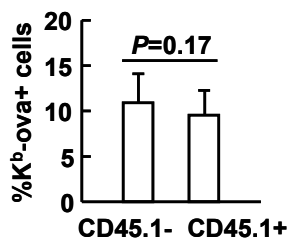

**Figure S2** Statistical data of Figure 2d.

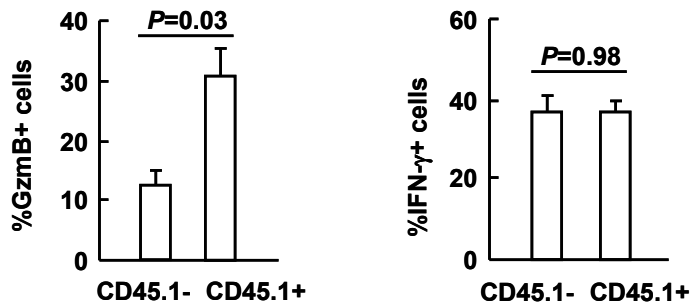

**Figure S3** Statistical data of Figure 3c.

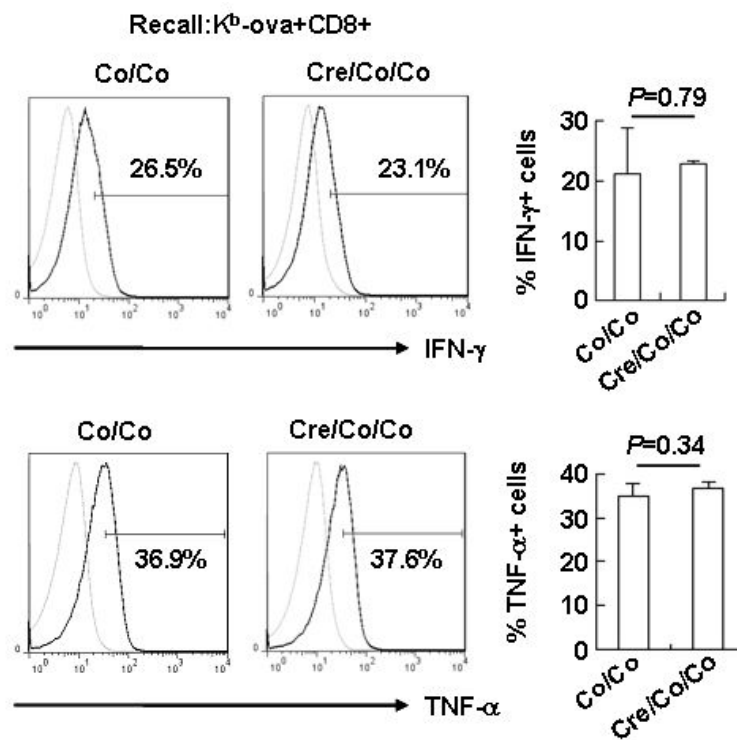

**Figure S4** The expression of IFN-γ and TNF-α in K<sup>b</sup>-ova+CD8+ splenic T cells upon OVA peptide restimulation was analyzed 5 days after the secondary infection.

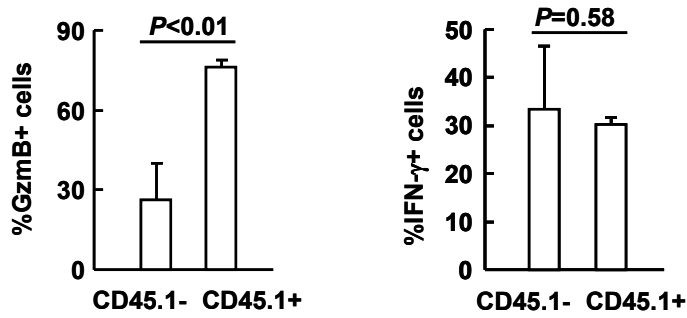

Figure S5 Statistical data of Figure 3f.

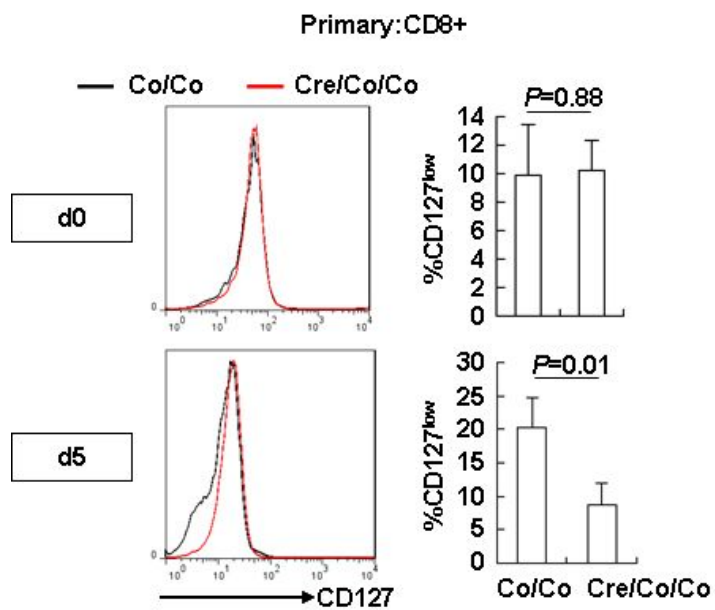

Figure S6 CD127 expression in CD8+ splenic T cells at day 0 and day 5 postinfection.

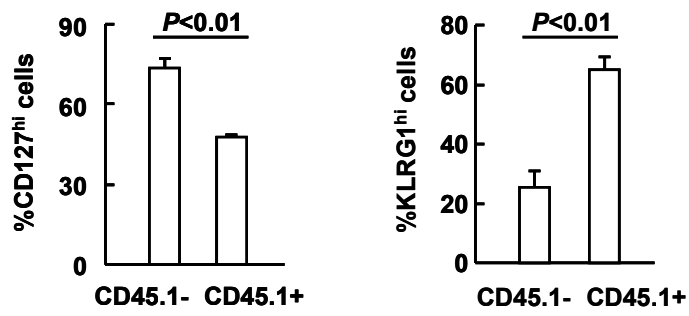

Figure S7 Statistical data of Figure 4c.

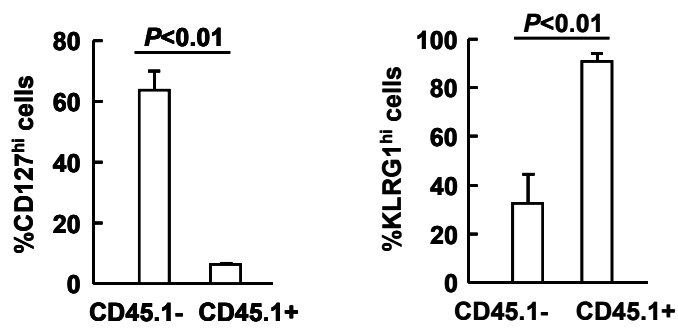

Figure S8 Statistical data of Figure 4d.

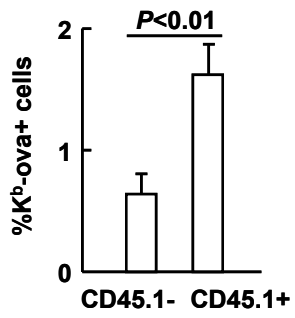

Figure S9 Statistical data of Figure 5d.

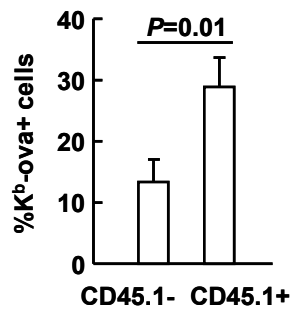

Figure S10 Statistical data of Figure 5e.
